# Supplementary material
Source: Springer Nature journal article supplement (https://www.springermedizin.de/resource/supplementary/12955_2010_767_MOESM1_ESM.pdf/9560950)

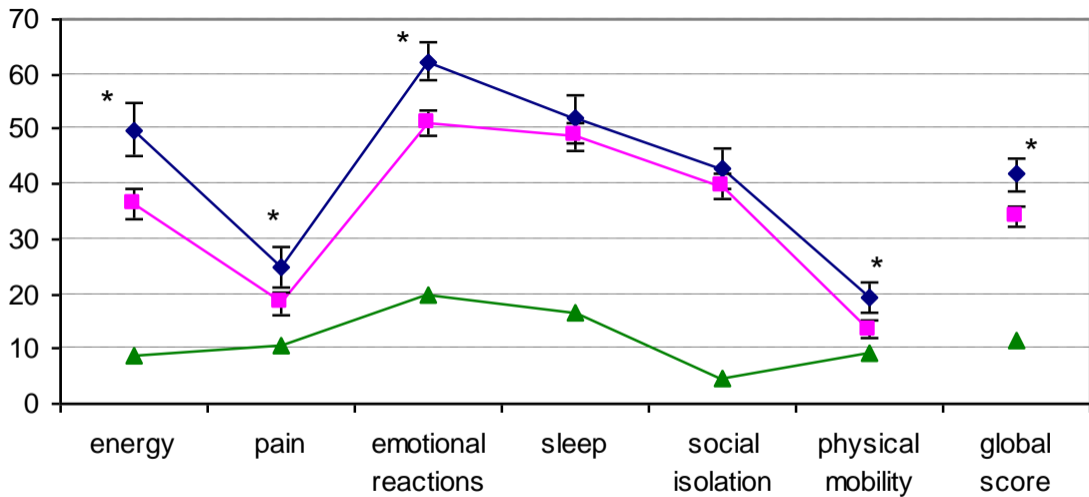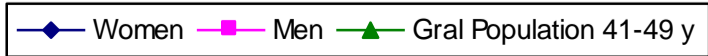

\*  $p < 0.05$

Supplement: MOESM1 [file 9560950]
